# Supplementary material
Source: publisher site journal article supplement (https://static.cambridge.org/content/id/urn:cambridge.org:id:article:S0266462311000262/resource/name/SupplementaryTable1.xls)
Supplement: Supplementary file 1 [file SupplementaryTable1.xls]

## Sheet: Ark1
SUPPLEMENTARY TABLE 1
List of HTAi Policy Forum Participants at the February 2011 Meeting
HTAi Policy Forum Chair
Henshall, Chris	University of York	UK
HTAi Policy Forum Delegates	Affiliation	Country
Ames, David	Johnson&Johnson	Canada
Arthur, Sandra	Kaiser Permanente	USA
Bols, Thomas	Merck Serono	Switzerland
Burrel, Anita	Sanofi-Aventis	USA
Butler, Jim	Medical Services Advisory Committee (MSAC)	Australia
Calvert, Barbara	Abbott	USA
Cargill, Kathy	Medtronic	Switzerland
Cros, Sophie	Abbott	Belgium
de Jong, Peter	Stryker	Netherlands
Fure, Brynjar	Norwegian Knowledge Centre for the Health Services (NOKC)	Norway
Goettsch, Wim	Dutch Health Care Insurance Board (CVZ)	Netherlands
Grainger, David	Eli Lilly	USA
Griffin, Adrian	Johnson&Johnson	UK
Gyldmark, Marlene	F.Hoffman-La Roche AG	Switzerland
Hafferty, Jonathan	Medicines and Healthcare Products Regulatory Agency (MHRA)	UK
Hebborn, Ansgar	F.Hoffman-La Roche AG	Switzerland
Holt, Simon	Novartis	Switzerland
Kirsch, Jeffrey	GlaxoSmithKline	UK
Lilliemark, Jan	Swedish Council on HTA (SBU)	Sweden
Longson, Carole	National Institute for Health and Clinical Excellence (NICE)	UK
McElwee, Newell	Merck & Co	USA
McGrath, Clare	Pfizer	UK
Meijer, Paulien	Merck & Co	USA
Mitchell, Andrew	Pharmaceutial Benefits Advisory Committee (PBAC)	Australia
Murray, James	Eli Lilly	USA
Nilsson, Fredrik	Swedish Dental and Pharmaceutical Benefits Agency (TLV)	Sweden
O`Rourke, Brian	Canadian Agency for Drugs and Technologies in Health (CADTH)	Canada
Paternostre, Elisabeth	Sanofi-Aventis	France
Rapplagiosi, Andrea	GlaxoSmithKline	Belgium
Rawlins, Michael	National Institute for Health and Clinical Excellence (NICE)	UK
Richards, Brian	Medical Services Advisory Committee (MSAC)	Australia
Røttingen, John-Arne	Norwegian Knowledge Centre for the Health Services (NOKC)	Norway
Sansom, Lloyd	Pharmaceutial Benefits Advisory Committee (PBAC)	Australia
Savill, Corinne	Novartis	Switzerland
Shea, Barb	Canadian Agency for Drugs and Technologies in Health (CADTH)	Canada
Siviero, Paolo Daniel	Italitan Medicines Agency (AIFA)	Italy
Steindl, Ludwig	Bayer	Germany
Sugarman, Mitch	Medtronic	USA
Tunis, Sean	Center for Medical Technology Policy (CMTP)	USA
Waibel, Franz	Bayer	Germany
Woods, Kent	Medicines and Healthcare Products Regulatory Agency (MHRA)	UK
Invited Guests
Eichler, Hans-Georg	European Medicines Agency (EMA)	UK
Facey, Karen	Consultant	UK
Jacques, Louis	Centers for Medicare & Medicaid Services (CMS)	USA
Pichler, Franz	Centre for Innovation in Regulatory Science (CIRS)	UK
Shuren, Jeffery	Food and Drug Administration (FDA)	USA
Storrie, Paddy	St George`s VA School	UK
HTAi Board Members
Asua, Jose	HTAi Board Observer	Spain
Banken, Reiner	HTAi Board Director	Canada
Cicchetti, Americo	HTAi Board Treasurer	Italy
Clifford, Tammy	HTAi Board Director	Canada
Goodman, Clifford	HTAi Board Vice President	USA
Gutierrez-Ibarluzea, Inaki	HTAi Board Director	Spain
Hiller, Janet	HTAi Board Director	Australia
Pwee Keng Ho	HTAi Board Director	Singapore
Lee-Robin, Sun-Hae	HTAi Board Director	France
Maddern, Guy	HTAi Board Secretary	Australia
Makela, Marjukka	HTAi Board Observer	Finland
Mathew, Joseph	HTAi Board Observer	India
Pearson, Steven	HTAi Board Director	USA
Sampietro-Colom, Laura	HTAi Board President	Spain
Sproule, John	HTAi Board Observer	Canada
HTAi Policy Forum Scientific Secretariat
Frønsdal, Katrine	Norwegian Knowledge Centre for the Health Services (NOKC)	Norway
Klemp, Marianne	Norwegian Knowledge Centre for the Health Services (NOKC)	Norway
HTAi Secretariat
Mardhani-Bayne, Logan	HTAi	Canada
